# Supplementary material for: Metabolic Characteristics and Discriminative Diagnosis of Growth Hormone Deficiency and Idiopathic Short Stature in Preadolescents and Adolescents
Source: MDPI journal article supplement (doi:10.3390/molecules29071661), 2024-04-07
Supplement: s1 [file s1]

## Supporting Information

# Metabolic characteristics and discriminative diagnosis of growth hormone deficiency and idiopathic short stature in pre-adolescents and adolescents

Yajie Chang<sup>1</sup>, Jing Chen<sup>2</sup>, Hongwei Zhu<sup>3</sup>, Rong Huang<sup>2</sup>, Jinxia Wu<sup>1</sup>, Yanyan Lin<sup>2</sup>, Quanquan Li<sup>1</sup>, Guiping Shen<sup>1\*</sup>, Jianghua Feng<sup>1\*</sup>

<sup>1</sup> Department of Electronic Science, Fujian Provincial Key Laboratory of Plasma and Magnetic Resonance, Xiamen University, Xiamen 361005, China; 1987256610@qq.com (Y.C.), 1262098472@qq.com (J.W.); 2911435264@qq.com (Q.L.)

<sup>2</sup> Department of Child Health, Women and Children's Hospital, School of Medicine, Xiamen University, Xiamen 361003, China; chenjing8469899@126.com (J.C.); huangrong83@hotmail.com (R.H.); lyy\_fjxm@126.com (Y.L.)

<sup>3</sup> Education Section and Department of Pediatrics, the First Affiliated Hospital of Bengbu Medical College, Bengbu 233004, China; zhuhongwei51136@126.com (H.Z.)

\* Correspondence: gpshen@xmu.edu.cn (G. S.); jianghua.feng@xmu.edu.cn (J. F.)

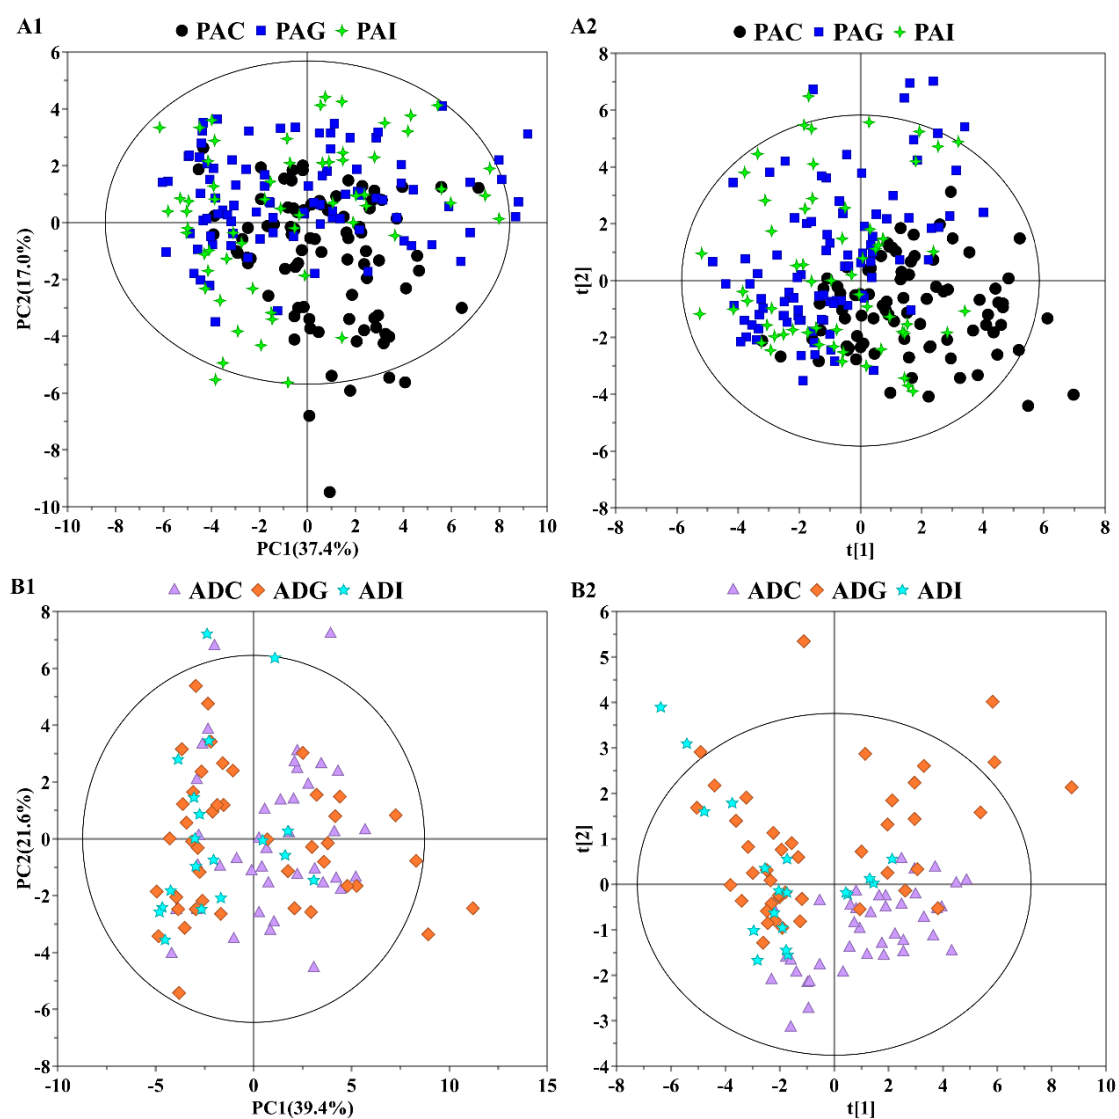

**Figure S1.** PCA (A1 and B1) and PLS-DA (A2 and B2) scores plots based on <sup>1</sup>H NMR data of serum from SS children and the corresponding controls. PAC, preadolescent control group; PAG, preadolescent growth hormone deficiency; PAI, preadolescent idiopathic short stature; ADC, adolescent control group; ADG, adolescent growth hormone deficiency; ADI, adolescent idiopathic short stature

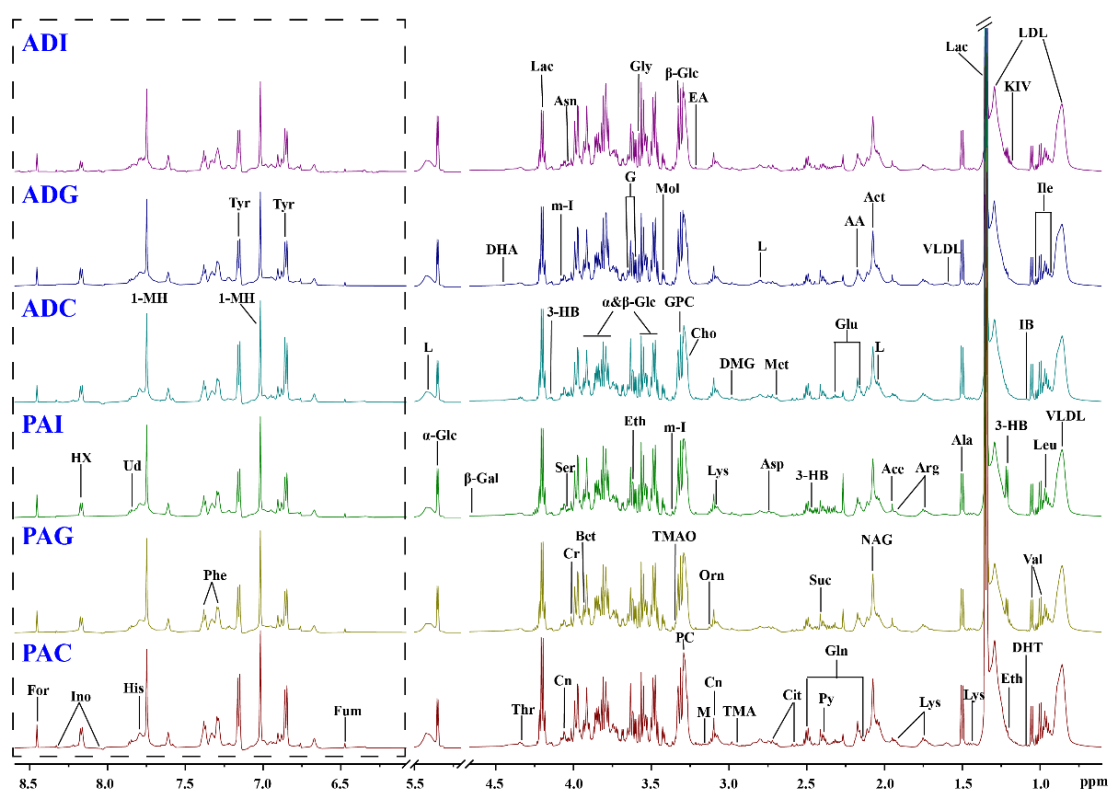

**Figure S2.** Average  $^1\text{H}$ -NMR spectra of different groups of serum samples. The spectral regions in the dashed boxes were vertically expanded 20 times for the purpose of clarity. Keys for the assignments are shown in Table S1 in the supplementary information. PAC, preadolescent control group; PAG, preadolescent growth hormone deficiency; PAI, preadolescent idiopathic short stature; ADC, adolescent control group; ADG, adolescent growth hormone deficiency; ADI, adolescent idiopathic short stature

**Table S1** The statistical data of the potential biomarkers in serum of SS children compared with their corresponding controls

1

|                | VIP         | FC    | r      | Raw p    | Age and sex<br>adjusted <i>p</i> | VIP         | FC    | r      | Raw p    | Age and Sex<br>adjusted <i>p</i> |
|----------------|-------------|-------|--------|----------|----------------------------------|-------------|-------|--------|----------|----------------------------------|
|                | PAG vs. PAC |       |        |          |                                  | PAI vs. PAC |       |        |          |                                  |
| 3-HB           | 3.637       | 1.487 | 0.632  | 2.10E-05 | 3.78E-08                         | 6.052       | 1.740 | 0.727  | 1.12E-03 | 3.81E-08                         |
| Acetate        | 1.531       | 1.285 | 0.474  | 2.77E-07 | 2.08E-14                         | /           | /     | /      | /        | /                                |
| Acetoacetate   | 1.462       | 1.205 | 0.519  | 4.91E-02 | 5.37E-10                         | /           | /     | /      | /        | /                                |
| Acetone        | /           | /     | /      | /        | /                                | 5.759       | 1.847 | 0.681  | 6.34E-04 | 4.33E-06                         |
| Choline        | 1.426       | 1.128 | 0.559  | 1.39E-06 | 4.21E-42                         | /           | /     | /      | /        | /                                |
| Ethanol        | /           | /     | /      | /        | /                                | 1.983       | 1.057 | 0.607  | 2.49E-02 | 9.76E-45                         |
| Glycerol       | 1.503       | 1.084 | 0.553  | 4.36E-06 | 4.64E-58                         | 1.721       | 1.053 | 0.624  | 1.25E-02 | 3.41E-49                         |
| Lactate        | /           | /     | /      | /        | /                                | 8.026       | 0.878 | -0.740 | 6.97E-03 | 1.33E-15                         |
| Lipid          | 2.146       | 0.810 | -0.827 | 8.06E-10 | 6.17E-31                         | 1.881       | 0.858 | -0.647 | 1.27E-04 | 3.91E-20                         |
| LDL            | 6.013       | 0.959 | -0.917 | 3.98E-02 | 6.49E-54                         | /           | /     | /      | /        | /                                |
| Lysine         | 1.945       | 1.032 | 0.651  | 4.49E-02 | 7.82E-62                         | /           | /     | /      | /        | /                                |
| NAG            | 1.860       | 0.953 | -0.720 | 1.32E-03 | 4.25E-73                         | 1.605       | 0.960 | -0.603 | 2.34E-02 | 2.61E-58                         |
| Phosphocholine | 1.592       | 1.085 | 0.376  | 4.02E-04 | 9.67E-45                         | /           | /     | /      | /        | /                                |
| Succinate      | 1.572       | 1.511 | 0.661  | 7.24E-14 | 2.26E-08                         | 2.576       | 1.680 | 0.773  | 3.84E-09 | 7.57E-09                         |
| VLDL           | 5.458       | 0.792 | -0.868 | 3.27E-04 | 3.21E-10                         | 4.581       | 0.820 | -0.720 | 4.13E-03 | 7.33E-05                         |
| α-Glucose      | 3.406       | 1.185 | 0.439  | 4.56E-04 | 4.51E-10                         | 3.807       | 1.226 | 0.501  | 1.11E-03 | 6.19E-10                         |
| β-Glucose      | 3.585       | 1.213 | 0.470  | 5.23E-04 | 3.41E-08                         | 3.909       | 1.257 | 0.493  | 5.82E-04 | 2.03E-08                         |
|                | ADG vs. ADC |       |        |          |                                  | ADI vs. ADC |       |        |          |                                  |
| Acetoacetate   | 1.474       | 0.857 | -0.598 | 8.51E-04 | 1.30E-03                         | /           | /     | /      | /        | /                                |
| Alanine        | /           | /     | /      | /        | /                                | 3.158       | 0.804 | -0.835 | 1.64E-04 | 5.00E-04                         |
| Asparagine     | /           | /     | /      | /        | /                                | 1.524       | 0.917 | -0.756 | 4.97E-02 | 3.48E-06                         |
| Creatine       | 1.475       | 0.904 | -0.414 | 1.41E-02 | 1.33E-04                         | 1.785       | 0.836 | -0.768 | 2.38E-04 | 8.10E-06                         |
| Creatinine     | 1.406       | 0.935 | -0.386 | 2.62E-02 | 9.31E-06                         | /           | /     | /      | /        | /                                |
| Glutamine      | 2.456       | 0.805 | -0.689 | 7.69E-08 | 1.88E-07                         | 2.474       | 0.879 | -0.742 | 3.24E-03 | 1.48E-07                         |

|            |       |       |        |          |          |        |       |        |          |          |
|------------|-------|-------|--------|----------|----------|--------|-------|--------|----------|----------|
| Glutamate  | /     | /     | /      | /        | /        | 1.917  | 0.717 | -0.863 | 3.04E-04 | 9.42E-04 |
| Glycine    | /     | /     | /      | /        | /        | 3.154  | 0.858 | -0.674 | 1.14E-03 | 9.88E-07 |
| Isoleucine | 2.223 | 0.846 | -0.641 | 2.10E-04 | 1.29E-04 | 2.185  | 0.815 | -0.847 | 2.20E-04 | 1.59E-02 |
| Lactate    | /     | /     | /      | /        | /        | 11.645 | 0.710 | -0.713 | 5.01E-03 | 2.01E-03 |
| Leucine    | 2.414 | 0.894 | -0.529 | 1.50E-03 | 1.88E-05 | 2.582  | 0.856 | -0.851 | 4.31E-04 | 2.40E-04 |
| Lysine     | 2.124 | 0.927 | -0.627 | 8.22E-03 | 3.23E-06 | 1.764  | 0.906 | -0.873 | 1.11E-02 | 1.78E-07 |
| Methionine | 2.118 | 0.834 | -0.736 | 3.29E-07 | 1.62E-09 | 1.803  | 0.870 | -0.853 | 4.32E-04 | 3.43E-08 |
| Ornithine  | /     | /     | /      | /        | /        | 2.345  | 0.867 | -0.840 | 3.52E-03 | 3.81E-05 |
| Pyruvate   | /     | /     | /      | /        | /        | 2.341  | 0.527 | -0.688 | 9.89E-05 | 3.02E-02 |
| TMAO       | /     | /     | /      | /        | /        | 2.516  | 0.883 | -0.617 | 2.02E-02 | 2.69E-07 |
| Valine     | 3.529 | 0.863 | -0.684 | 2.16E-04 | 1.00E-04 | 3.080  | 0.798 | -0.861 | 1.36E-05 | 2.80E-04 |

Abbreviations: 3-HB, 3-Hydroxybutyrate; LDL, Low Density Lipoprotein; NAG, N-Acetyl-glycoprotein signals; VLDL, Very Low Density Lipoprotein; TMAO, Trimethylamine N-oxide; VIP, Variable importance for projection; FC, Fold change of metabolite ( $FC = C_{\text{disease}}/C_{\text{control}}$ ). PAC, preadolescent control group; PAG, preadolescent growth hormone deficiency; PAI, preadolescent idiopathic short stature; ADC, adolescent control group; ADG, adolescent growth hormone deficiency; ADI, adolescent idiopathic short stature.

**Table S2** Identified metabolites from the <sup>1</sup>H NMR spectra of serum

6

| No. | Metabolites                   | Abbr. | Chemical shift (multiplicity <sup>1</sup> )       |
|-----|-------------------------------|-------|---------------------------------------------------|
| 1   | Low density lipoprotein       | LDL   | 0.86(br); 1.28(br)                                |
| 2   | Very Low Density Lipoprotein  | VLDL  | 0.89(br); 1.30(br); 1.58(br)                      |
| 3   | Isoleucine                    | Ile   | 0.94(t); 1.01(t)                                  |
| 4   | Leucine                       | Leu   | 0.96(dd)                                          |
| 5   | Valine                        | Val   | 0.99(d); 1.04(d)                                  |
| 6   | Isobutyrate                   | IB    | 1.07(d)                                           |
| 7   | Dihydrothymine                | DHT   | 1.09(d)                                           |
| 8   | α-Ketoisovalerate             | KIV   | 1.14(d)                                           |
| 9   | Ethanol                       | Eth   | 1.18(t); 3.66(q)                                  |
| 10  | 3-Hydroxybutyrate             | 3-HB  | 1.20(d); 2.31(dd); 2.39(dd);<br>2.43(dd); 4.16(m) |
| 11  | Lactate                       | Lac   | 1.33(d); 4.11(q)                                  |
| 12  | Lysine                        | Lys   | 1.43(m); 1.74(m); 1.89(m);<br>3.02(t); 3.76(t)    |
| 13  | Alanine                       | Ala   | 1.48(d);                                          |
| 14  | Arginine                      | Arg   | 1.70(m); 1.90(m); 2.26(t)                         |
| 15  | Acetate                       | Ace   | 1.92(s)                                           |
| 16  | Lipid                         | L     | 2.02(br); 2.23(br); 2.78(br);<br>5.30(br)         |
| 17  | N-Acetyl-glycoprotein signals | NAG   | 2.04(s)                                           |
| 18  | Glutamate                     | Glu   | 2.08(m); 2.12(m); 2.35(m);                        |
| 19  | Glutamine                     | Gln   | 2.12(m); 2.14(m); 2.45(m)                         |
| 20  | Methionine                    | Met   | 2.14(s); 2.16(s); 2.65(t)                         |
| 21  | Acetone                       | Act   | 2.23(s)                                           |
| 22  | Acetoacetate                  | AA    | 2.28(s); 3.44(s)                                  |
| 23  | Pyruvate                      | Py    | 2.37(s)                                           |
| 24  | Succinate                     | Suc   | 2.41(s);                                          |
| 25  | Citrate                       | Cit   | 2.53(d); 2.68(d)                                  |
| 26  | Aspartate                     | Asp   | 2.68(dd); 2.82(dd)                                |
| 27  | Asparagine                    | Asn   | 2.85(dd); 2.95(dd); 3.99(m)                       |
| 28  | Trimethylamine                | TMA   | 2.90(s)                                           |
| 29  | N,N-Dimethylglycine           | DMG   | 2.93(s)                                           |
| 30  | Creatine                      | Cr    | 3.04(s); 3.93(s)                                  |
| 31  | Creatinine                    | Cn    | 3.05(s); 4.06(s)                                  |
| 32  | Ornithine                     | Orn   | 3.06(t); 3.79(t)                                  |
| 33  | Phenylalanine                 | Phe   | 3.11(m); 7.33(d); 7.37(m); 7.43(m)                |
| 34  | Malonate                      | M     | 3.11(s)                                           |
| 35  | Histidine                     | His   | 3.13(m); 7.05(s); 7.77(s)                         |
| 36  | Ethanolamine                  | EA    | 3.15(t)                                           |
| 37  | Choline                       | Cho   | 3.20(s)                                           |
| 38  | Phosphocholine                | PC    | 3.21(s)                                           |

|    |                              |               |                                                                     |
|----|------------------------------|---------------|---------------------------------------------------------------------|
| 39 | Glycerophosphorylcholine     | GPC           | 3.23(s); 3.35(s); 4.34(m)                                           |
| 40 | $\beta$ -Glucose             | $\beta$ -Glc  | 3.25(dd); 3.41(t); 3.46(dd);<br>3.49(t); 3.73(t); 3.90(dd); 4.65(d) |
| 41 | Trimethylamine N-oxide       | TMAO          | 3.27(s)                                                             |
| 42 | <i>myo</i> -Inositol         | m-I           | 3.27(t); 3.62(m); 4.07(m)                                           |
| 43 | Methanol                     | Mol           | 3.36(s)                                                             |
| 44 | $\alpha$ -Glucose            | $\alpha$ -Glc | 3.42(t); 3.54(dd); 3.72(t); 3.84(m);<br>5.24(d)                     |
| 45 | Glycine                      | Gly           | 3.56(s)                                                             |
| 46 | Glycerol                     | G             | 3.58(m); 3.66(m)                                                    |
| 47 | Betaine                      | Bet           | 3.90(s)                                                             |
| 48 | Serine                       | Ser           | 3.95(m)                                                             |
| 49 | Threonine                    | Thr           | 4.26(m)                                                             |
| 50 | Dihydroxyacetone             | DHA           | 4.42(s)                                                             |
| 51 | $\beta$ -Galactose           | $\beta$ -Gal  | 4.52(d)                                                             |
| 52 | Inosine                      | Ino           | 6.10(d); 8.24(s); 8.35(s)                                           |
| 53 | Fumarate                     | Fum           | 6.52(s)                                                             |
| 54 | Tyrosine                     | Tyr           | 6.90(d); 7.19(d);                                                   |
| 55 | <i>para</i> -Hydroxybenzoate | HBA           | 6.93(d); 7.81(d)                                                    |
| 56 | 1-Methylhistidine            | 1-MH          | 7.03(s); 7.63(s)                                                    |
| 57 | Uridine                      | Ud            | 7.88(s)                                                             |
| 58 | Hypoxanthine                 | HX            | 8.19(s); 8.21(s)                                                    |
| 59 | Formate                      | For           | 8.46(s)                                                             |

<sup>1</sup> Multiplicity: s, singlet; d, doublet; t, triplet; q, quartet; dd, doublet of doublets; m, multiplet; **br**, broad resonance.

7  
8
